# Supplementary material
Source: PubMed Central journal article supplement (PMC5097696)
Supplement: NIHMS775000-supplement-Supplementary_figures_1_to_4.pdf [file NIHMS775000-supplement-Supplementary_figures_1_to_4.pdf]

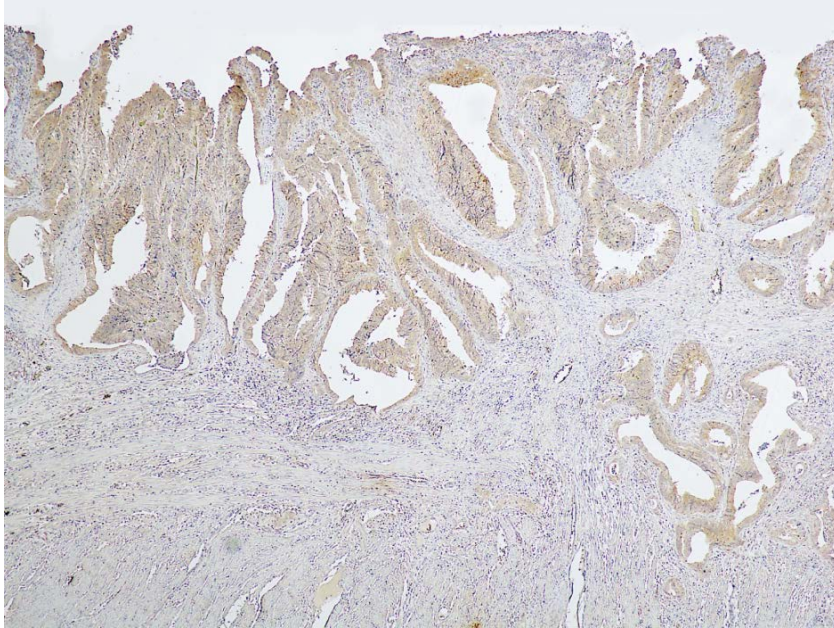

Supplementary figure 1. Tumour cells show considerably homogenous CD274 expression in the immunohistochemical analysis using whole tissue sections.

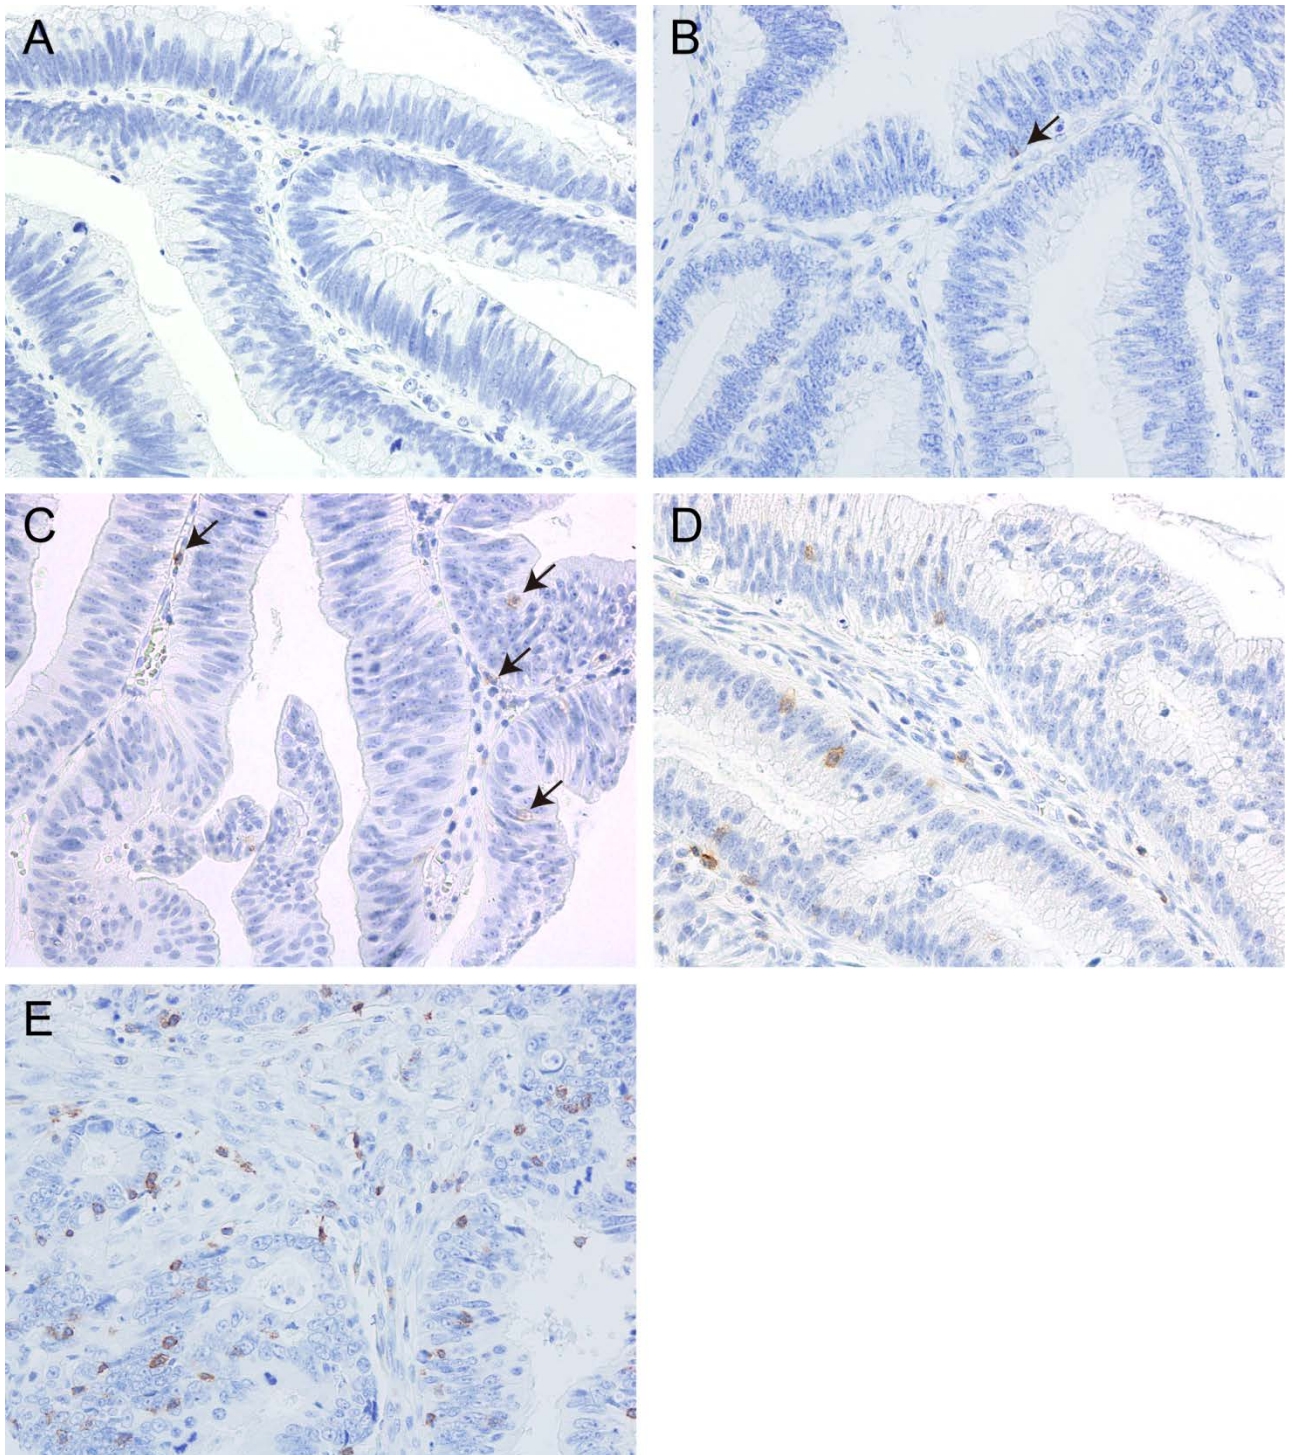

Supplementary figure 2. PDCD1 expression in colorectal carcinoma tissue. PDCD1<sup>+</sup> cell density was semiquantitatively scored as absent (A), very low (B), low (C), intermediate (D), and high (E), based on the number of PDCD1<sup>+</sup> cells in a high-power microscopic field in tumour tissue. Arrows indicate PDCD1<sup>+</sup> cells, including tumour-infiltrating lymphocytes (TIL).

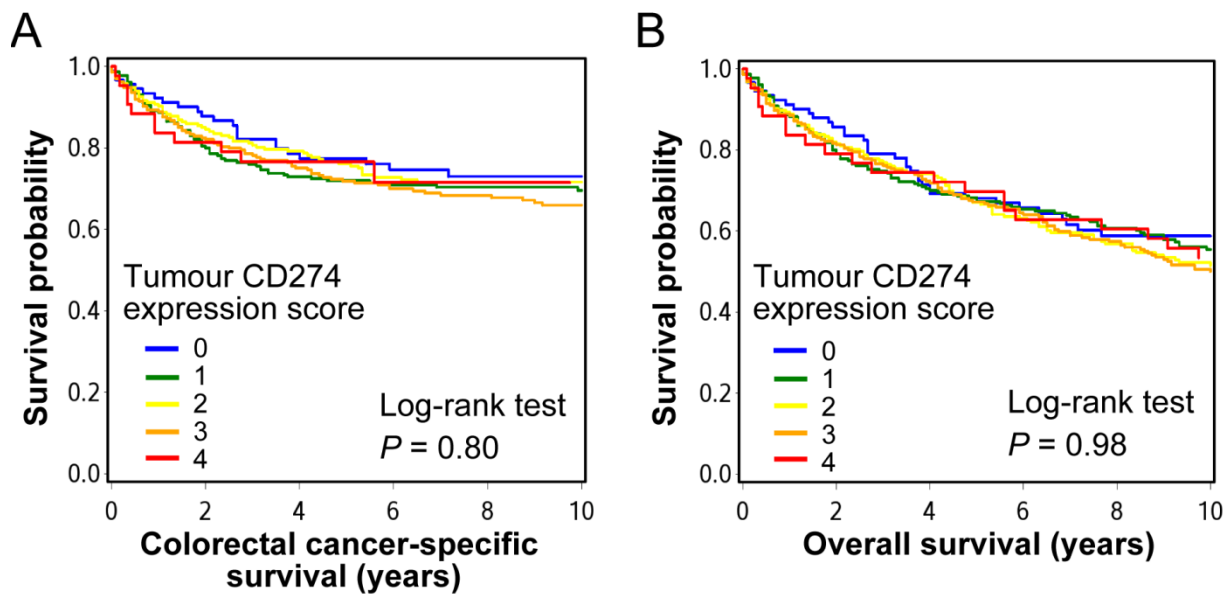

**Number at risk**

| Tumour CD274 expression score | Year |     |     |     |     |    |
|-------------------------------|------|-----|-----|-----|-----|----|
|                               | 0    | 2   | 4   | 6   | 8   | 10 |
| 0                             | 91   | 78  | 63  | 53  | 39  | 35 |
| 1                             | 230  | 182 | 158 | 134 | 111 | 87 |
| 2                             | 216  | 176 | 160 | 128 | 103 | 72 |
| 3                             | 235  | 191 | 168 | 139 | 118 | 98 |
| 4                             | 43   | 34  | 32  | 27  | 26  | 22 |

Supplementary figure 3. Kaplan-Meier curves for colorectal cancer-specific survival (A) and overall survival (B) according to the tumour CD274 expression score.  $P$  value was calculated by the log-rank test. The table (bottom) shows the number of patients who remained alive and at risk of death at each time point after the diagnosis of colorectal cancer.

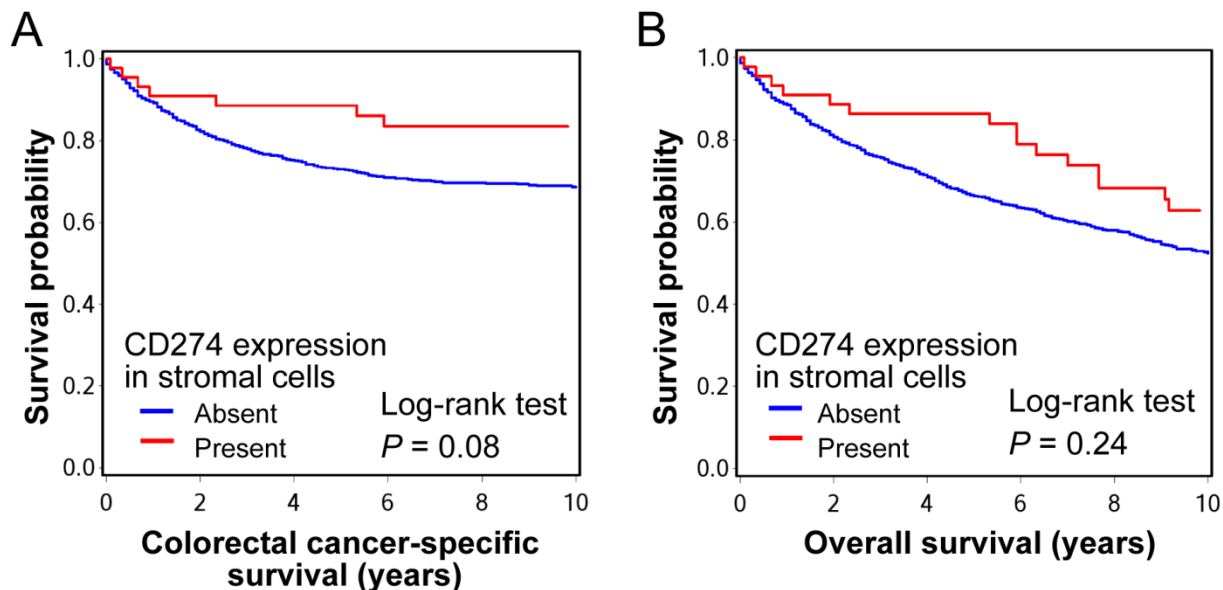

**Number at risk**

| CD274 expression in stromal cells | Year |     |     |     |     |     |
|-----------------------------------|------|-----|-----|-----|-----|-----|
|                                   | 0    | 2   | 4   | 6   | 8   | 10  |
| Absent                            | 771  | 622 | 543 | 449 | 372 | 294 |
| Present                           | 44   | 39  | 38  | 32  | 25  | 20  |

Supplementary figure 4. Kaplan-Meier curves for colorectal cancer-specific survival (A) and overall survival (B) according to CD274 expression in stromal cells including immune cells.  $P$  value was calculated by the log-rank test. The table (bottom) shows the number of patients who remained alive and at risk of death at each time point after the diagnosis of colorectal cancer.
